# Supplementary material
Source: MDPI journal article supplement (https://www.mdpi.com/2073-4344/12/10/1247)

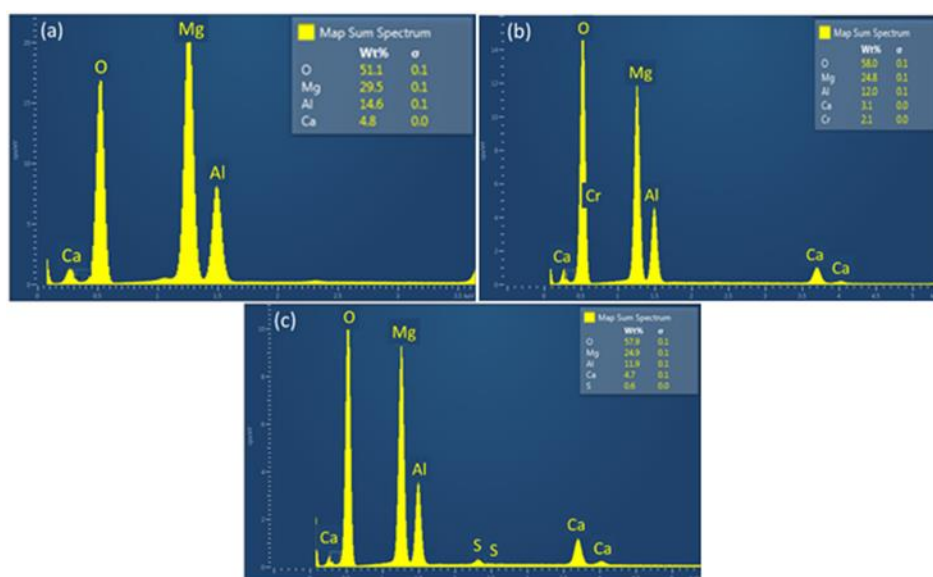

**Figure S1.** EDS analysis of fresh Mg-Ca-Al-LDO (a), after Cr adsorption (b) and after EBT adsorption (c)

Supplement: s1 [file s1]
